# Supplementary material for: Rapid Discrimination of Cheese Products Based on Probabilistic Neural Network and Raman Spectroscopy
Source: Hindawi journal article supplement (doi:10.1155/2020/8896535), 2020-11-02
Supplement: f1 [file 8896535.f1.docx]

**Electronic Supplementary Material**

**Rapid discrimination of cheese products based on probabilistic neural network and Raman spectroscopy**

Zheng-Yong Zhang1,2*

1 State Key Laboratory of Dairy Biotechnology, Shanghai Engineering Research Center of Dairy Biotechnology, Dairy Research Institute, Bright Dairy & Food Co., Ltd., Shanghai 200436, The People’s Republic of China

2 School of Management Science and Engineering, Nanjing University of Finance and Economics, Nanjing Jiangsu 210023, The People’s Republic of China

*Correspondence to Prof. Zheng-Yong Zhang. E-mail: zyzhang@nufe.edu.cn





**Figure S1.** Raman spectra of brand XX cheese products.





**Figure S2.** Raman spectra of brand YY cheese products.





**Figure S3.** Raman spectra of brand ZZ cheese products.


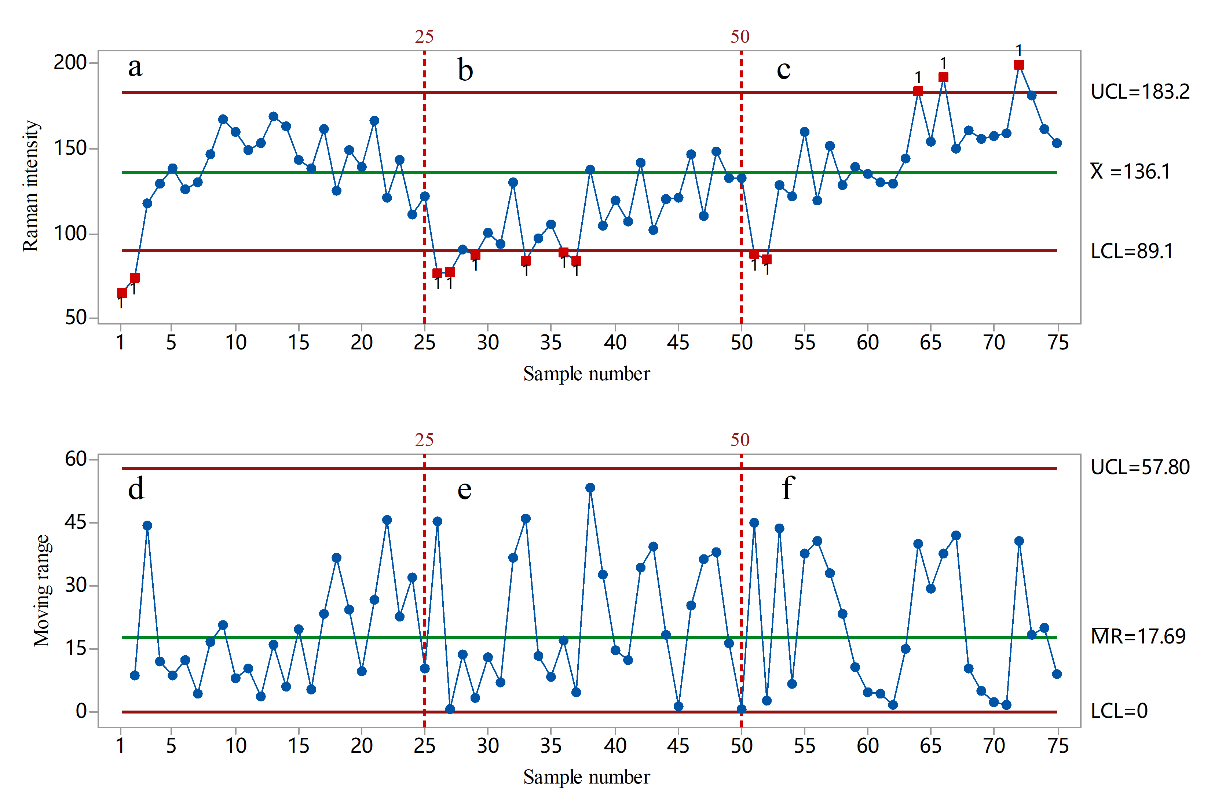


**Figure S4.** Quality fluctuation individual value of brand YY (a), brand XX (b) and brand ZZ (c), and moving range of brand YY (d), brand XX (e) and brand ZZ (f) based on Raman peak intensities (at 1760 cm-1), respectively.

UCL = upper control limit; LCL = lower control limit; MR = the average value of moving range control chart. The UCL, LCL, MR were calculated based on the Raman data of brand YY.


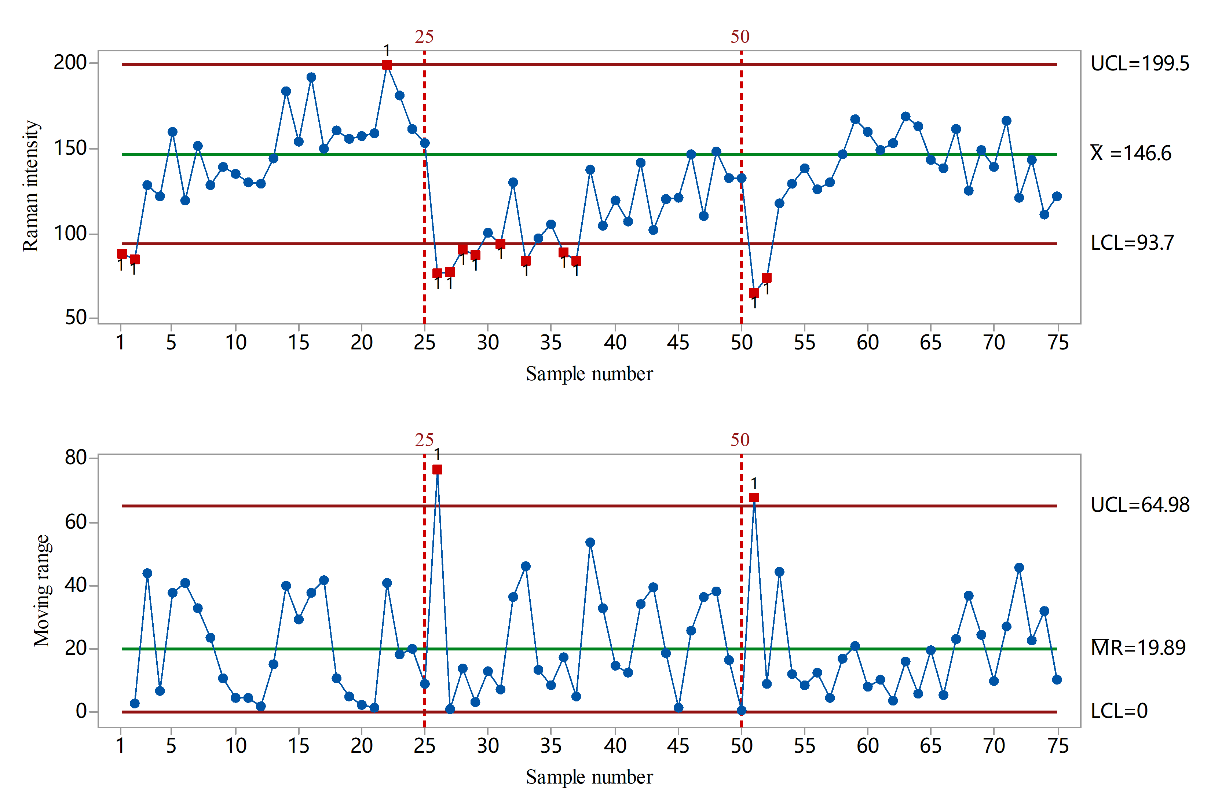


**Figure S5.** Quality fluctuation individual value of brand ZZ (a), brand XX (b) and brand YY (c), and moving range of brand ZZ (d), brand XX (e) and brand YY (f) based on Raman peak intensities (at 1760 cm-1), respectively.

UCL = upper control limit; LCL = lower control limit; MR = the average value of moving range control chart. The UCL, LCL, MR were calculated based on the Raman data of brand ZZ.


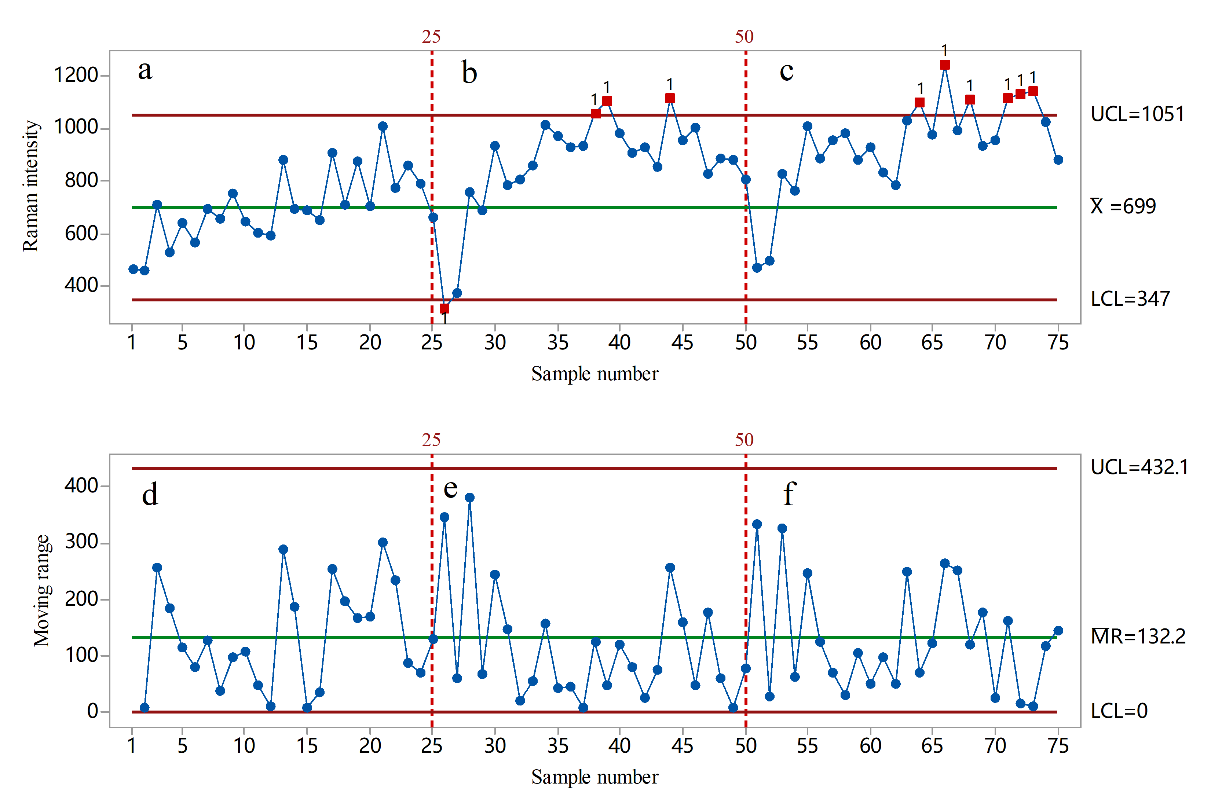


**Figure S6.** Quality fluctuation individual value of brand XX (a), brand YY (b) and brand ZZ (c), and moving range of brand XX (d), brand YY (e) and brand ZZ (f) based on Raman peak intensities (at 1458 cm-1), respectively.

UCL = upper control limit; LCL = lower control limit; MR = the average value of moving range control chart. The UCL, LCL, MR were calculated based on the Raman data of brand XX.


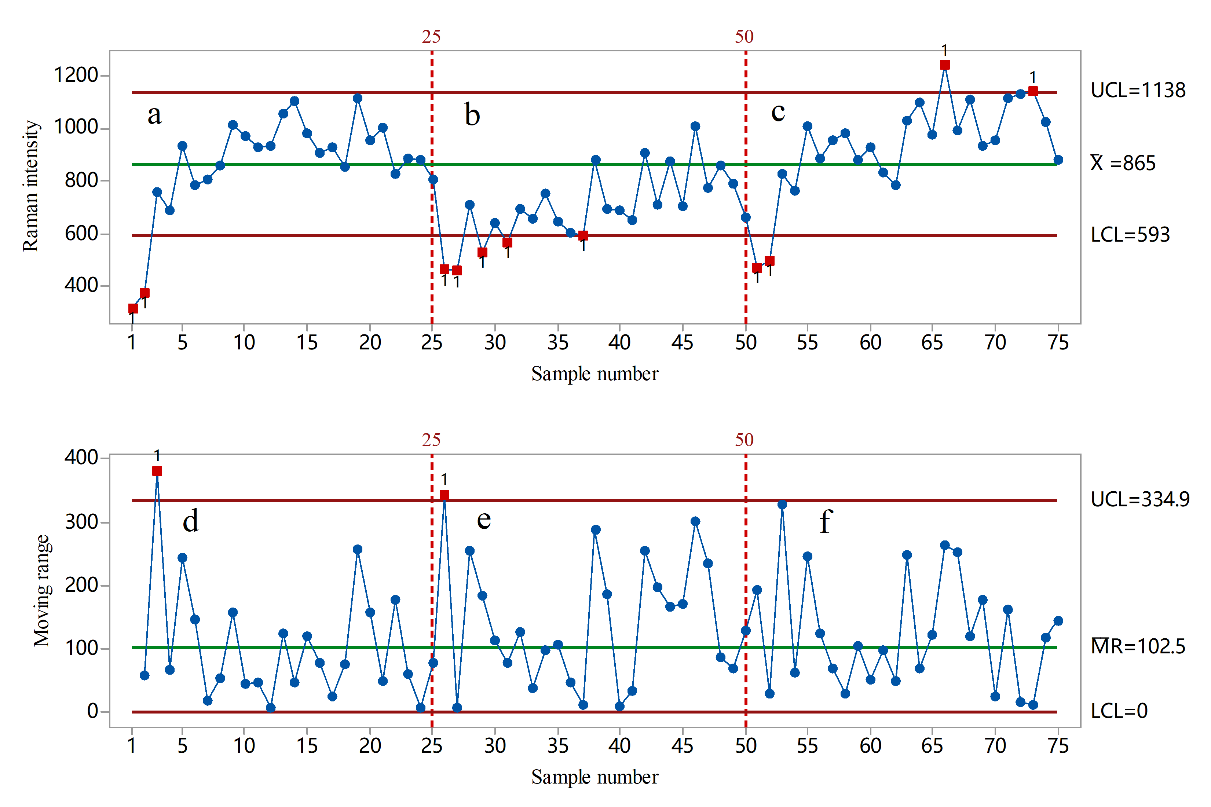


**Figure S7.** Quality fluctuation individual value of brand YY (a), brand XX (b) and brand ZZ (c), and moving range of brand YY (d), brand XX (e) and brand ZZ (f) based on Raman peak intensities (at 1458 cm-1), respectively.

UCL = upper control limit; LCL = lower control limit; MR = the average value of moving range control chart. The UCL, LCL, MR were calculated based on the Raman data of brand YY.


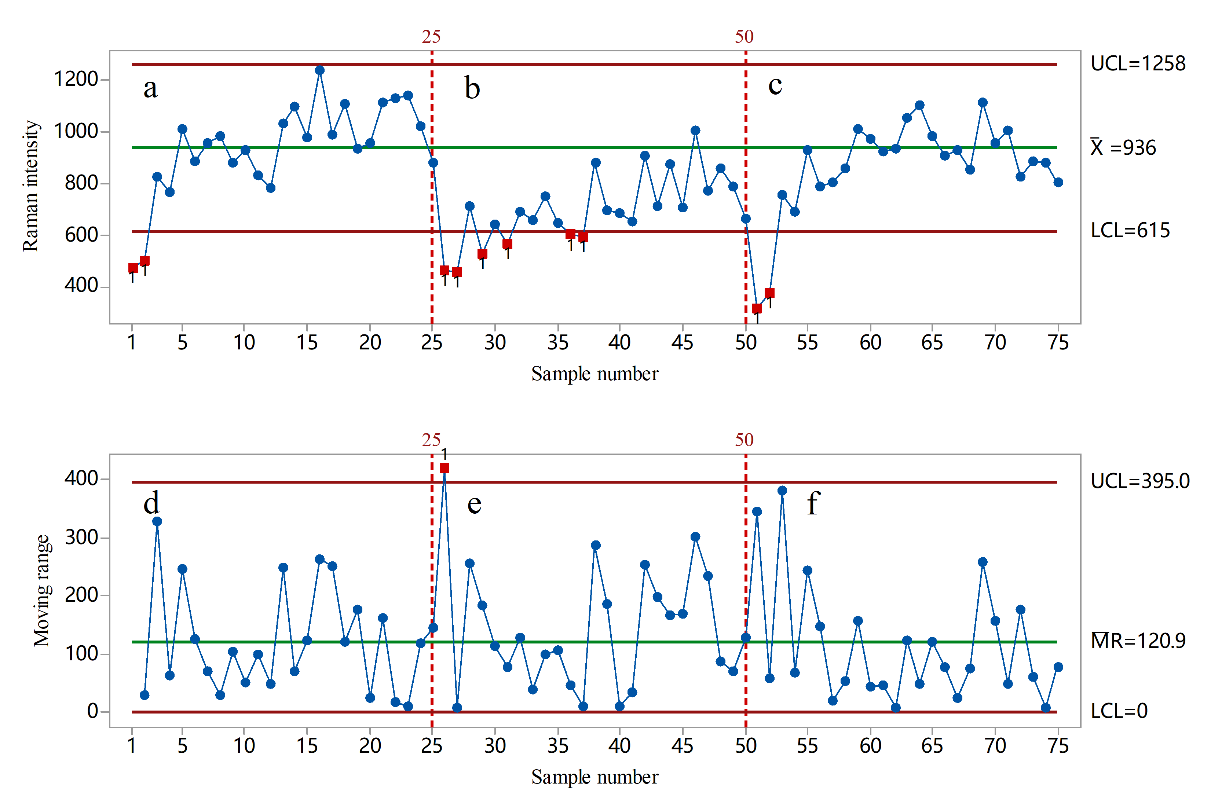


**Figure S8.** Quality fluctuation individual value of brand ZZ (a), brand XX (b) and brand YY (c), and moving range of brand ZZ (d), brand XX (e) and brand YY (f) based on Raman peak intensities (at 1458 cm-1), respectively.

UCL = upper control limit; LCL = lower control limit; MR = the average value of moving range control chart. The UCL, LCL, MR were calculated based on the Raman data of brand ZZ.


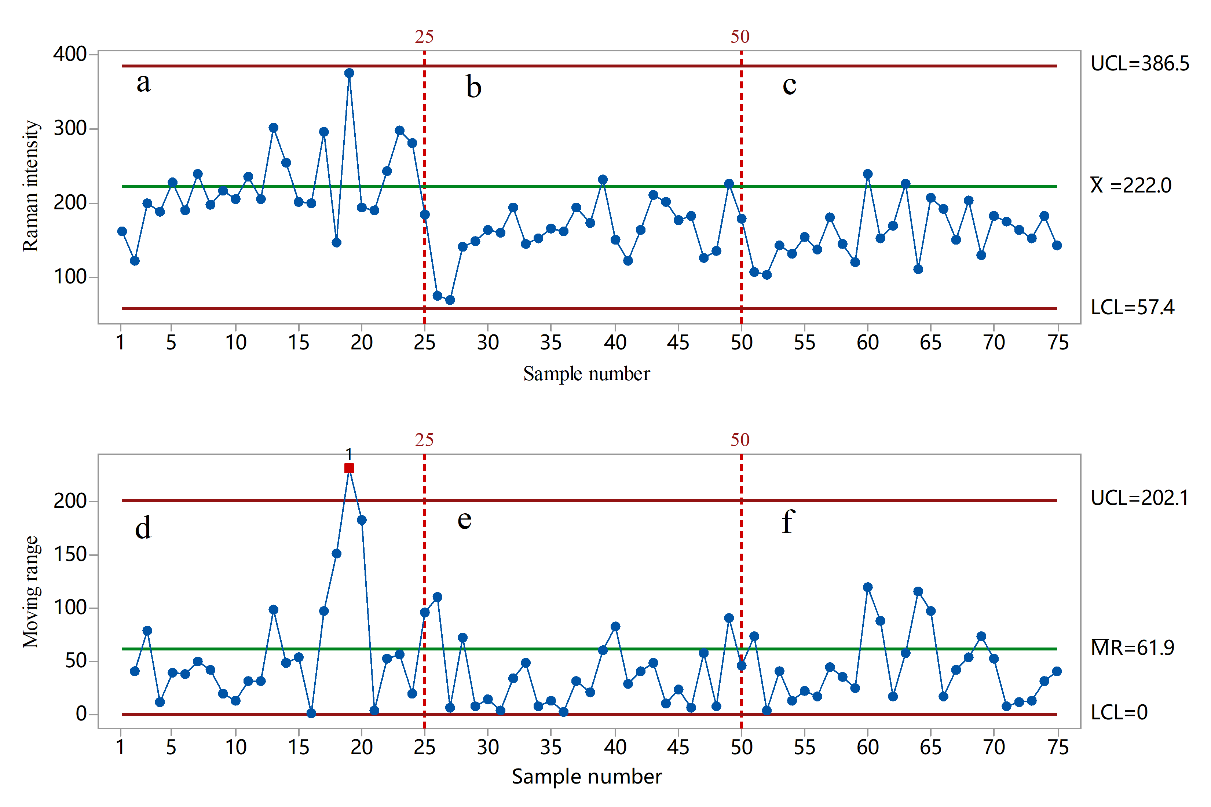


**Figure S9.** Quality fluctuation individual value of brand XX (a), brand YY (b) and brand ZZ (c), and moving range of brand XX (d), brand YY (e) and brand ZZ (f) based on Raman peak intensities (at 1019 cm-1), respectively.

UCL = upper control limit; LCL = lower control limit; MR = the average value of moving range control chart. The UCL, LCL, MR were calculated based on the Raman data of brand XX.


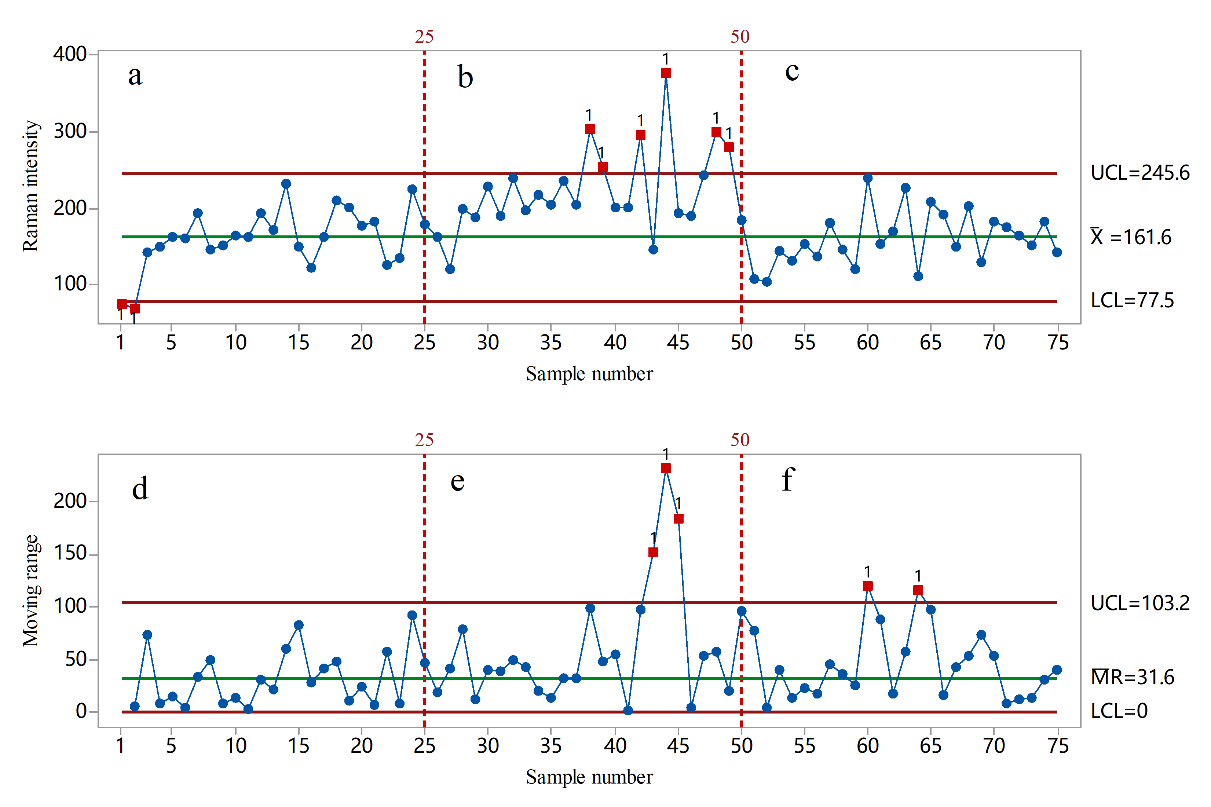


**Figure S10.** Quality fluctuation individual value of brand YY (a), brand XX (b) and brand ZZ (c), and moving range of brand YY (d), brand XX (e) and brand ZZ (f) based on Raman peak intensities (at 1019 cm-1), respectively.

UCL = upper control limit; LCL = lower control limit; MR = the average value of moving range control chart. The UCL, LCL, MR were calculated based on the Raman data of brand YY.


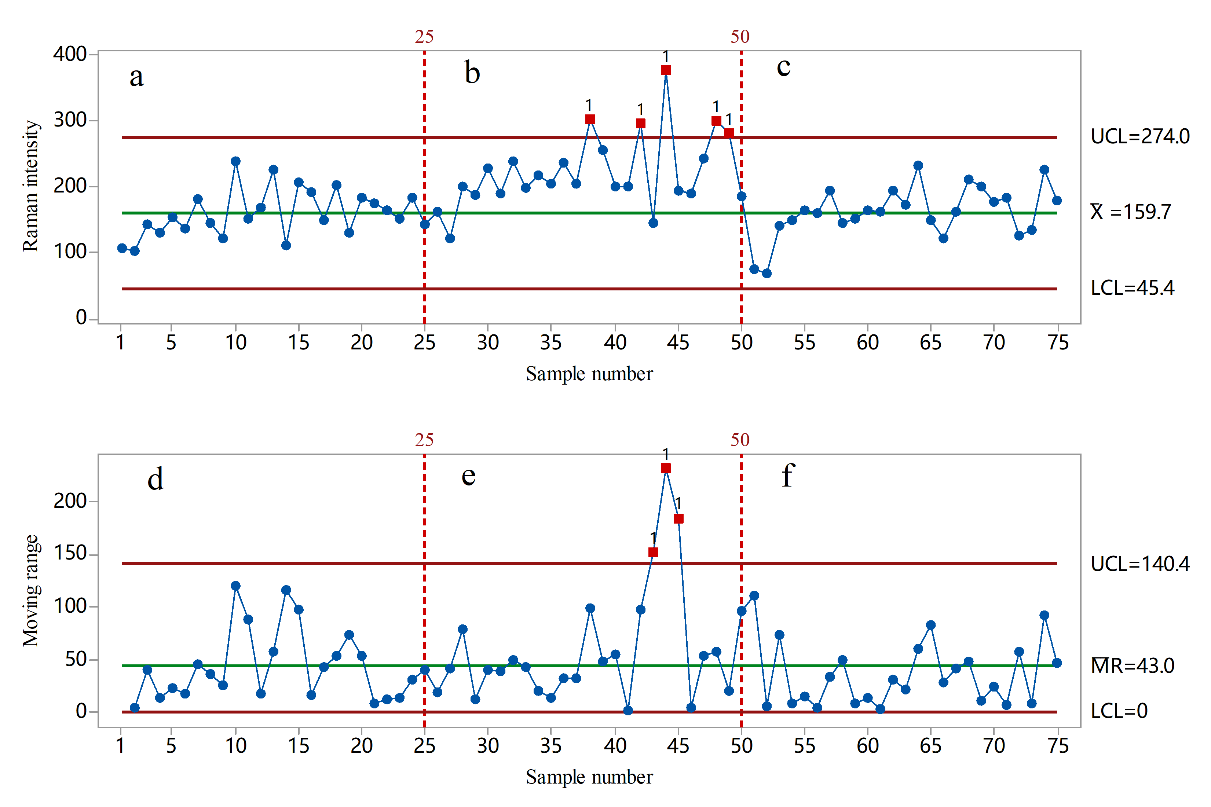


**Figure S11.** Quality fluctuation individual value of brand ZZ (a), brand XX (b) and brand YY (c), and moving range of brand ZZ (d), brand XX (e) and brand YY (f) based on Raman peak intensities (at 1019 cm-1), respectively.

UCL = upper control limit; LCL = lower control limit; MR = the average value of moving range control chart. The UCL, LCL, MR were calculated based on the Raman data of brand ZZ.





**Figure S12.** Raman spectra of brand XX (a), brand YY (b) and brand ZZ (c) cheese products after wavelet denoising and normalization, respectively.


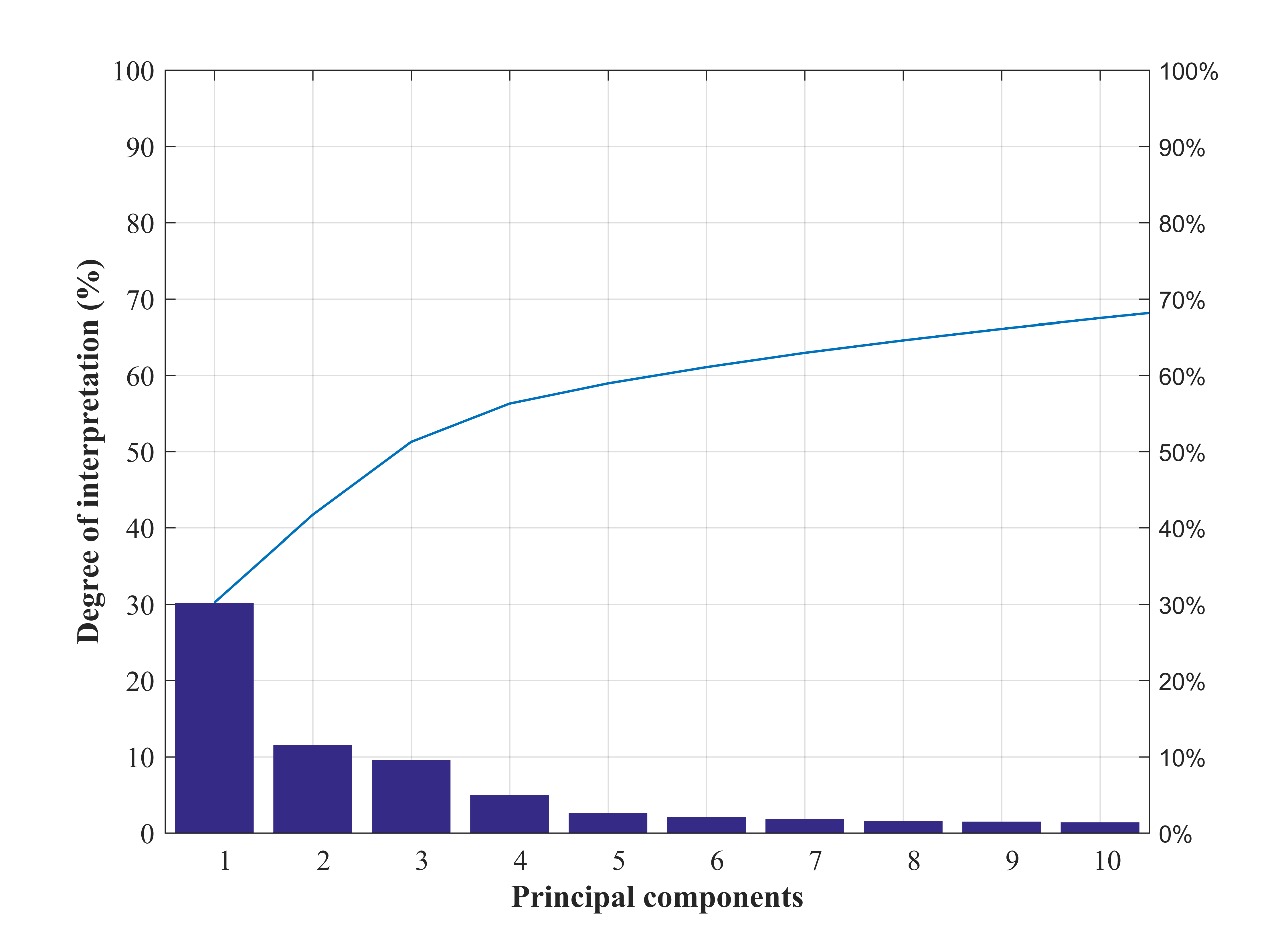


**Figure S13.** Pareto diagram of principal component analysis.
